# Supplementary material for: Protein Restriction with Amino Acid-Balanced Diets Shrinks Circulating Pool Size of Amino Acid by Decreasing Expression of Specific Transporters in the Small Intestine
Source: PubMed Central journal article supplement (PMC5017764; doi:10.1371/journal.pone.0162475), 2016-09-09
Supplement: pone.0162475.s001.pdf [file pone.0162475.s001.pdf]

Ingredient and nutrient composition of experimental diets (as-fed basis)

|                                          | Dietary crude protein level, % |  |              |  |              |  |
|------------------------------------------|--------------------------------|--|--------------|--|--------------|--|
|                                          | 18                             |  | 16           |  | 14           |  |
| Ingredients, % <sup>1</sup>              |                                |  |              |  |              |  |
| Corn                                     | 68.05                          |  | 74.30        |  | 80.18        |  |
| Wheat bran                               | 4.04                           |  | 2.92         |  | 2.63         |  |
| Soybean meal                             | 24.60                          |  | 18.94        |  | 12.56        |  |
| Soybean oil                              | -                              |  | -            |  | 0.03         |  |
| Limestone                                | 1.30                           |  | 1.26         |  | 1.22         |  |
| Dicalcium phosphate                      | 0.56                           |  | 0.69         |  | 0.80         |  |
| Sodium chloride                          | 0.20                           |  | 0.20         |  | 0.20         |  |
| L-Lysine HCl                             | 0.26 (22.4%)                   |  | 0.44 (38.9%) |  | 0.64 (57.1%) |  |
| DL-Methionine                            | 0.07 (10.4%)                   |  | 0.12 (18.5%) |  | 0.18 (26.5%) |  |
| L-Threonine                              | 0.06 ( 7.7%)                   |  | 0.14 (18.4%) |  | 0.23 (31.9%) |  |
| L-Tryptophan                             | 0.01 ( 5.3%)                   |  | 0.04 (23.5%) |  | 0.07 (41.2%) |  |
| L-Isoleucine                             | -                              |  | 0.04 ( 6.3%) |  | 0.15 (27.3%) |  |
| L-Valine                                 | -                              |  | 0.06 ( 7.3%) |  | 0.17 (21.0%) |  |
| L-Histidine                              | -                              |  | -            |  | 0.06 (17.6%) |  |
| L-Phenylalanine                          | -                              |  | -            |  | 0.03 ( 4.4%) |  |
| Vitamin- mineral premix <sup>2</sup>     | 0.85                           |  | 0.85         |  | 0.85         |  |
| Nutrient composition                     |                                |  |              |  |              |  |
| Dry matter, %                            | 87.57                          |  | 87.80        |  | 87.78        |  |
| Crude protein, %                         | 18.04                          |  | 15.32        |  | 13.88        |  |
| Digestible energy, Mcal/kg               | 3.42                           |  | 3.41         |  | 3.40         |  |
| Metabolizable energy, Mcal/kg            | 3.30                           |  | 3.31         |  | 3.30         |  |
| Calcium, %                               | 0.66                           |  | 0.66         |  | 0.66         |  |
| STTD <sup>3</sup> phosphorus, %          | 0.26                           |  | 0.26         |  | 0.26         |  |
| Essential amino acids, % <sup>4,5</sup>  |                                |  |              |  |              |  |
| Arginine                                 | 1.11 [1.01]                    |  | 0.93 [0.84]  |  | 0.73 [0.65]  |  |
| Histidine                                | 0.45 [0.40]                    |  | 0.39 [0.34]  |  | 0.34 [0.34]  |  |
| Isoleucine                               | 0.73 [0.56]                    |  | 0.63 [0.51]  |  | 0.55 [0.51]  |  |
| Leucine                                  | 1.57 [1.28]                    |  | 1.43 [1.15]  |  | 1.27 [1.00]  |  |
| Lysine                                   | 1.16 [0.98]                    |  | 1.13 [0.98]  |  | 1.12 [0.98]  |  |
| Methionine                               | 0.35 [0.31]                    |  | 0.36 [0.34]  |  | 0.38 [0.37]  |  |
| Methionine + cysteine                    | 0.67 [0.55]                    |  | 0.65 [0.55]  |  | 0.68 [0.55]  |  |
| Phenylalanine                            | 0.89 [0.78]                    |  | 0.79 [0.68]  |  | 0.68 [0.59]  |  |
| Threonine                                | 0.77 [0.59]                    |  | 0.76 [0.59]  |  | 0.72 [0.59]  |  |
| Tryptophane                              | 0.19 [0.17]                    |  | 0.17 [0.17]  |  | 0.17 [0.17]  |  |
| Valine                                   | 0.87 [0.67]                    |  | 0.82 [0.64]  |  | 0.81 [0.64]  |  |
| Nonessential amino acids, % <sup>4</sup> |                                |  |              |  |              |  |
| Alanine                                  | 0.98                           |  | 0.89         |  | 0.79         |  |
| Aspartate                                | 1.76                           |  | 1.46         |  | 1.13         |  |
| Cysteine                                 | 0.32                           |  | 0.30         |  | 0.30         |  |
| Glutamate                                | 2.99                           |  | 2.59         |  | 2.15         |  |
| Glycine                                  | 0.76                           |  | 0.64         |  | 0.54         |  |
| Proline                                  | 1.07                           |  | 0.99         |  | 0.87         |  |
| Serine                                   | 0.88                           |  | 0.76         |  | 0.63         |  |
| Tyrosine                                 | 0.52                           |  | 0.45         |  | 0.39         |  |

<sup>1</sup> The values in the parentheses are the ratio of crystalline amino acid to total amino acid.

<sup>2</sup> Supplied the following (per kg of feed): vitamin A as retinyl acetate, 5 KIU; vitamin D<sub>3</sub> as cholecalciferol, 1.5 KIU, vitamin E as DL-alpha tocopheryl acetate, 15 IU; vitamin K<sub>3</sub> as menadione nicotinamide bisulfite, 3 mg; thiamine as thiamine mononitrate, 1 mg; riboflavin, 3 mg; pyridoxine as pyridoxine hydrochloride, 1 mg; vitamin B<sub>12</sub>, 10 µg; niacin as nicotinamide and nicotinic acid, 20 mg; D-pantothenic acid as D-calcium pantothenate, 12 mg; folic acid, 0.65 mg; biotin, 40 µg; Fe, 90 mg as iron sulfate; Cu, 150 mg as copper sulfate; Zn, 100 mg as zinc oxide; Mn, 20 mg as manganese sulfate; I, 0.48 mg as potassium iodate; Se, 0.36 mg as sodium selenite; Chlortetracycline, 50 mg; olaquinox, 50 mg; sweetener, 1 g; flavor, 0.8 g; probiotics, 0.4 g; and phytase, 0.1 g; Choline chloride, 0.06 kg.

<sup>3</sup> STTD, Standardized total tract digestible.

<sup>4</sup> Analytical results obtained according to the Association of Official Analytical Chemists (AOAC, 2003).

<sup>5</sup> The values in the square brackets are standardized ileal digestible (SID) amino acid contents which were calculated according to NRC (2012).
